# Supplementary material
Source: ML conference proceedings conference paper supplement (https://openaccess.thecvf.com/content/CVPR2021/html/Zhang_DCNAS_Densely_Connected_CVPR_2021_paper.html)
Supplement: Supplementary file 1 [file Zhang_DCNAS_Densely_Connected_CVPR_2021_supplemental.zip]

Archive with 2 entries (2 files):
- DCNAS-sup.pdf
- __MACOSX/._DCNAS-sup.pdf
